# Supplementary material for: Bi-molecular kinetic competition for surface passivation in high-performance perovskite solar cells
Source: Royal Society of Chemistry journal article supplement (doi:10.1039/d3ee03439a), 2024-01-01
Supplement: d3ee03439a1.pdf [file d3ee03439a1.pdf]

**Table S1** Summary on representative progress of state-of-the-art perovskite solar cells by two-step fabrication under n-i-p configuration since 2019.

| Years       | $V_{oc}$<br>(V) | $J_{sc}$<br>(mA cm <sup>-2</sup> ) | FF<br>(%)    | PCE<br>(%)   | Type of cations                 | References                                      |
|-------------|-----------------|------------------------------------|--------------|--------------|---------------------------------|-------------------------------------------------|
| 2019        | 1.16            | 24.9                               | 81.4         | 23.56        | Mixed-cations<br>(FAMA)         | Nature Photonics,<br>2019, 13(7): 460-<br>466.  |
| 2020        | 1.16            | 24.8                               | 81.3         | 23.5         | Mixed-cations<br>(FAMAGA)       | Advanced<br>Materials.<br>2020, 32, 11.         |
| 2021        | 1.18            | 24.95                              | 81.58        | 24.01        | Mixed-cations<br>(FAMA)         | Energy Environ.<br>Sci., 2021,14, 5074-<br>5083 |
| 2021        | 1.17            | 25.34                              | 81.36        | 24.1         | Single -cations<br>(FA)         | Science,2021, 371,<br>1359                      |
| 2021        | 1.16            | 25.01                              | 83.44        | 24.27        | Mixed-cations<br>(FAMACs)       | Science, 2021,<br>373(6554): 561-567            |
| 2022        | 1.18            | 25.0                               | 82.7         | 24.4         | Mixed-cations<br>(FAMA)         | Advanced<br>Materials, 2022,<br>34(8): 2106118. |
| 2022        | 1.17            | 25.30                              | 84.2         | 24.95        | Mixed-cations<br>(FAMA)         | Joule, 2022, 6(12):<br>2869-2884.               |
| 2022        | 1.18            | 26.3                               | 82.7         | 25.6         | Single -cations<br>(FA)         | Science,2022,377,<br>531–534                    |
| 2023        | 1.171           | 25.28                              | 84.57        | 25.03        | Mixed-cations<br>(FAMA)         | Advanced<br>Materials, 2023:<br>2210186.        |
| 2023        | 1.18            | 25.77                              | 83.50        | 25.39        | Single-cations<br>(FA)          | Nature<br>Communications,<br>2023, 14(1): 6125. |
| 2023        | 1.17            | 25.72                              | 83.67        | 25.17        | Mixed-cations<br>(FAMA)         | Nature Photonics,<br>2023: 1-9                  |
| 2023        | 1.19            | 26.39                              | 82.94        | 26.07        | Single-cations<br>(FA)          | Nature, (2023)<br>1476-4687 (online)            |
| <b>2023</b> | <b>1.16</b>     | <b>25.76</b>                       | <b>84.35</b> | <b>25.23</b> | <b>Mixed-cations<br/>(FAMA)</b> | <b>This work</b>                                |
