# Supplementary material for: Bi-molecular kinetic competition for surface passivation in high-performance perovskite solar cells
Source: Royal Society of Chemistry journal article supplement (doi:10.1039/d3ee03439a), 2024-01-01
Supplement: d3ee03439a2.pdf [file d3ee03439a2.pdf]

## Supplemental information

### **Bi-molecular Kinetic Competition for Surface Passivation in High- Performance Perovskite Solar Cells**

*Yinyi Ma<sup>1</sup>, Faming Li<sup>1</sup>, Jue Gong<sup>1</sup>, Lina Wang<sup>1</sup>, Xiao Tang<sup>1</sup>, Peng Zeng<sup>1</sup>,  
Pok Fung Chan<sup>3</sup>, Weidong Zhu<sup>4</sup>, Chunfu Zhang<sup>4</sup>, and Mingzhen Liu<sup>1, 2,\*</sup>*

1 School of Materials and Energy, University of Electronic Science and Technology of China, Chengdu 611731, P.R. China.

2 State Key Laboratory Electronic Thin Film and Integrated Devices, University of Electronic Science and Technology of China, Chengdu 611731, P.R. China.

3 Department of Physics. The Chinese University of Hong Kong Shatin, Hong Kong SAR 999077, China

4 State Key Discipline Laboratory of Wide Band Gap Semiconductor Technology and Shaanxi Joint Key Laboratory of Graphene, School of Microelectronics, Xidian University, Xi'an, 710071, P.R. China.

\*Correspondence: E-mail: [mingzhen.liu@uestc.edu.cn](mailto:mingzhen.liu@uestc.edu.cn) (M.Z.L.)

## Methods

**Materials:** Materials used in experiments include FAI (99.9%, Dyesol), MAI (99.9%, Dyesol), lithium bis(trifluoromethanesulfonyl)imide (Li-TFSI, 99.95%, Sigma-Aldrich), SnO<sub>2</sub> colloid precursor (Alfa Aesar, tin(IV) oxide, 15% in H<sub>2</sub>O colloidal dispersion), 4-tertbutylpyridine (4-tBP, 96%, Sigma-Aldrich), chlorobenzene (Sigma-Aldrich), N,N-dimethylformamide (DMF, 99.8%, Sigma-Aldrich), dimethylsulfoxide (DMSO, 99.5%, Sigma-Aldrich), isopropanol (99.99%, Sigma-Aldrich), PbI<sub>2</sub> (99.99%, Sigma-Aldrich), Spiro-OMeTAD (99.8%, Borun New Material Technology), MACl (99.9%), OAI (99.9%) and PMAI (99.5%) were purchased from Xi'an Polymer Light Technology in China. All chemicals were directly used without any further purification.

**Device fabrication:** Fluorine-tin-oxide (FTO) glass was cleaned by ultrasonic cleaner using acetone and ethanol sequentially. Before use, the FTO was cleaned with ultraviolet ozone for 30 min. Then SnO<sub>2</sub> colloid solution diluted by water (1:5) was spin coated on the substrate at 3000 rpm for 30 s, and annealed in ambient air at 150 °C for 30 min. It is better to clean the substrate with ultraviolet ozone for 10 min before preparation of perovskite films. First, 1.5 M of PbI<sub>2</sub> in DMF: DMSO (9:1) solvent stirred at 70 °C overnight was spin-coated on the SnO<sub>2</sub> substrate at 1500 rpm for 30 s, then annealed at 70 °C for 1 min. After cooling down, the FAI/MAI/MACl (90 mg: 6 mg: 9 mg in 1 ml IPA) solution was subsequently spin-coated on the PbI<sub>2</sub> layer at 2000 rpm for 30 s. Then, the film was annealed at 150 °C for 15 min in air (30-40% humidity). After perovskite formation, the samples were transferred to glove box for further processing. For a single passivation treatment, the PMAI and OAI were dissolved separately in IPA solution and spin-coated on the perovskite surface at 5000 rpm for 30 s. For bi-molecular passivation treatment. PMAI (35 mM) and OAI (10 mM) were dissolved in the same bottle of IPA solution and spin-coated on the perovskite surface at 5500 rpm for 30 s. Finally, the hole-transport layer was deposited by spin-coating the Spiro-OMeTAD solution at 3000 rpm for 30 s on the top of perovskite film, which consisted of 73.4 mg Spiro-OMeTAD, 17.6 μL Li-TFSI solution (520 mg Li-TFSI in 1 mL ACN) and 28.8 μL 4-tBP in 1 mL CB. At last, 100 nm Au electrode was thermally

evaporated on top of the Spiro-OMeTAD layer.

Optimized high-efficiency device fabrication conditions: Except for slightly changing the preparation method of the perovskite layer, the preparation method of the rest of the layers is the same as above. Specifically, 1.55 M  $\text{PbI}_2$  were dissolved in DMF/DMSO (95:5) solvent, the rotation speed was adjusted to 1300 rpm for 30 s, and then preheated on a 70 °C for 10 s. The organic salt solution FAI/MAI/MACl (95 mg: 7 mg: 10 mg in 1 ml IPA) were quickly dropped on the  $\text{PbI}_2$  films and spin-coated at 1800rpm for 30 s. In addition, in order to increase the optical transmittance of the device surface, a 120 nm LiF anti-reflection layer was thermally deposited on the back of the glass substrate.

**Device Characterizations:** Bruker D8 Advance diffractometer with Cu  $K\alpha$  radiation ( $\lambda = 1.5418 \text{ \AA}$ ) and LYNXEYE\_XE detector was used to record X-ray diffraction patterns of films and powders. Grazing incidence wide-angle X-ray scattering (GIWAXS) measurements were conducted at a Xeuss 2.0 SAXS/WAXS laboratory beamline equipped with a Cu X-ray source (8.05 keV, 1.54  $\text{\AA}$ ) and a Pilatus3R 300K detector. Three incident angles ( $0.1^\circ$  and  $0.5^\circ$ ) were selected to represent the crystal structure of perovskite with different depths. Scanning electron microscope images were gained by FEI Inspect F50 electron microscope with electron energy of 10 keV. Steady-state and time-resolved PL decays were characterized by using FluoTime300 (PicoQuant). For PL measurements, the background subtractions were performed by multi-exponential fittings with a constant term. For the temperature-dependent PL measurement, we tested PL curves every 10 K from 70 K to 300 K, the samples were placed in a helium compressor system (Advanced Research Systems). X-ray photoelectron spectroscopy (XPS) was detected by the Thermo Fisher Scientific Escalab 250Xi system by using a He discharge lamp (21.22 eV). The XPS spectra were calibrated using inorganic carbon at 284.8 eV. The J-V curves were measured by Keithley 2400 digital source-meter and the devices were placed under simulated AM 1.5G irradiation (100 mW/cm<sup>2</sup>, xenon lamp, Newport). The effective area of the cell was defined by a metal mask (device area: 0.09 cm<sup>2</sup>; measurement mask size: 0.0491 cm<sup>2</sup>). The electrochemical impedance spectra (EIS) of the solar cells were obtained by an electrochemical workstation (ZAHNER). Mott-Schottky analysis of the data was measured at a frequency of 1 kHz

with bias potentials from 0 to 1 V. The KPFM measurements were conducted by an AFM (KEYSIGHT Technologies 7500) with a Pt-coated conductive cantilever probe (Bruker, Model: SCM-PIT-V2). Transient photocurrent (TPC) measurement was performed with a system excited by a 532 nm (1000 Hz, 3.2 ns) pulse laser. Transient photo voltage (TPV) measurement was performed with the same system excited by a 405 nm CW laser (MDL-III-405). A digital oscilloscope (Tektronix, MSO5204B) was used to record the photocurrent or photovoltage decay process with a sampling resistor of 50  $\Omega$  or 1 M $\Omega$ , respectively. EQE spectra are performed through Enli Technology QE-R.

**Stability Tests:** The devices used for stability testing are all uncapsulation. To ensure the stability of the ambient humidity, the devices were placed under dark ambient conditions (RH: 30 $\pm$ 5%, temperature: 25 $^{\circ}$ C). Operation stability measurement were performed MPP tracking under continuous illumination from a full AM1.5 sun-equivalent white LED lamp in N<sub>2</sub> atmosphere, followed by normalizing the PCEs measured before aging.

**Density Functional Theory Calculation:** We use first-principles excited states molecular dynamics methods with CP2K/Quickstep<sup>1</sup> to study the adsorption, formation processes of OA, PMA and perovskite. Molecular dynamics algorithm combined with NVT ensemble, Nose-Hover thermostat<sup>2,3</sup>, 0.1 fs step size, 30,000 steps. The force and velocity are calculated using density functional theory (DFT)<sup>4</sup> for BLYP functional<sup>5</sup>, Gaussian-type basis set<sup>6</sup> and Goedecker-Teter-Hutter (GTH) pseudopotentials<sup>7, 8</sup> combined with Gamma k-point and 400 eV cut-off energy. In the calculation steps, the energy minimization is used to balance the system, and then the Maxwell distribution method is used to give the molecules different collision probabilities, and then the dynamic process is carried out. The post processes analysis are performed by self-programs in Python.

The adsorption energy is calculated by the formula of:

$$E = E_{ads + sub} - E_{ads} - E_{sub} + E_{free\ energy\ correction} \quad \text{Equation S1}$$

The formation energy is calculated and satisfied by:

$$E = E_{bulk} - E_{atomic} - \sum n_i \mu_i \quad \text{Equation S2}$$

We aim at 2D perovskite, the initial state is 3D perovskite, and by sampling the formation of 2D perovskite, which is the formation energy of the intercalation process of organic matter, doing the reformation on the lattice scale.

**Figure caption**

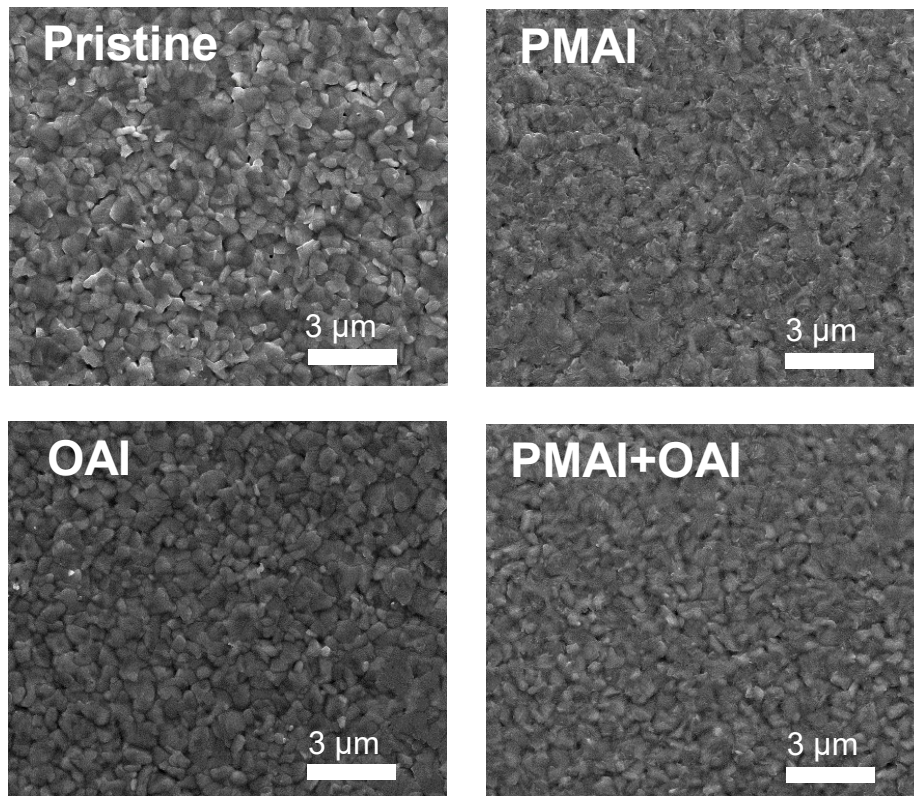

**Figure S1.** Top view SEM images of pristine, PMAI-treatment, OAI-treatment and OAI+PMAI treatment.

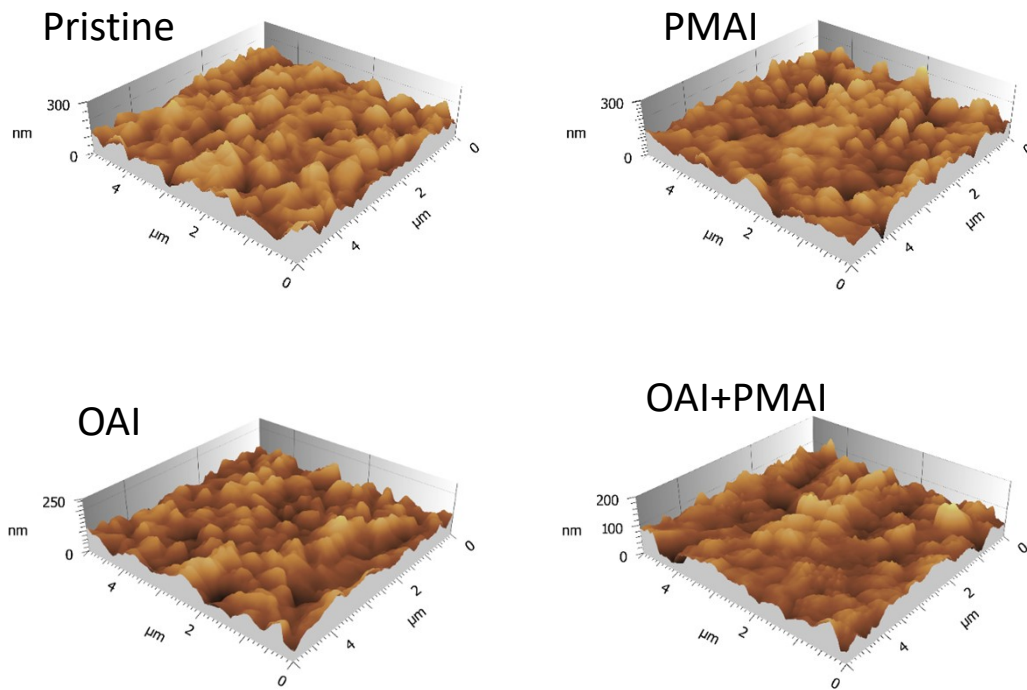

**Figure S2.** The 3D AFM images of pristine, PMAI-treatment, OAI-treatment and OAI+PMAI treatment.

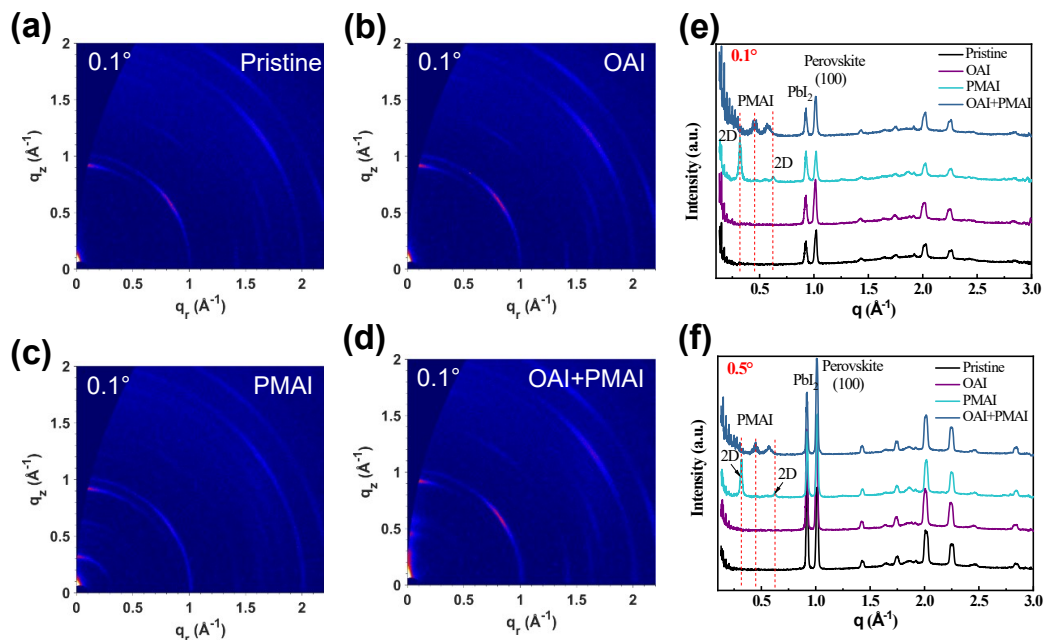

**Figure S3.** (a-d) GIWAXS mapping of different surface passivation treatments at a swept incidence angle of  $0.1^\circ$ . (e) GIWAXS intensity profiles for different surface passivation treatments at a swept incidence angle of  $0.1^\circ$ . (f) GIWAXS intensity profiles for different surface passivation treatments at a swept incidence angle of  $0.5^\circ$ .

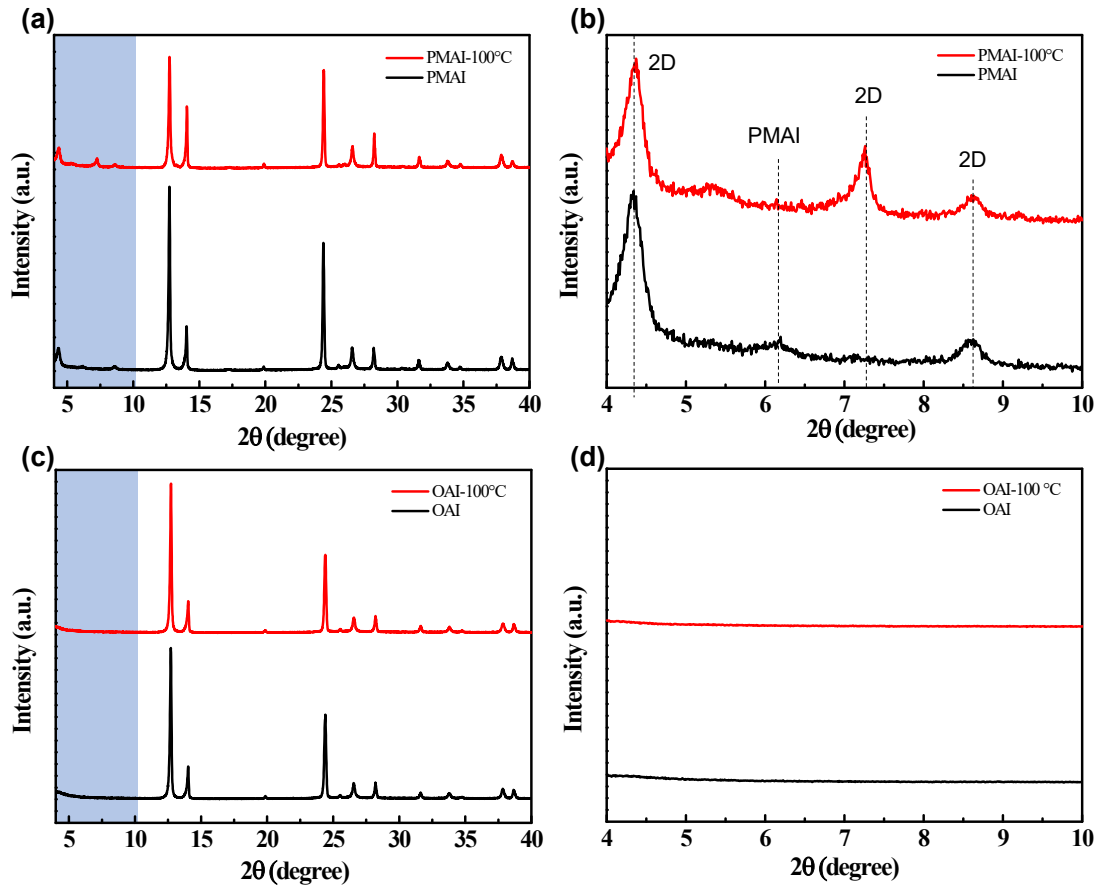

**Figure. S4** XRD patterns of surface passivation without annealing treatment and annealing treatment by heating at 100 °C for 5 minutes. (a) PMAI passivation treatment and enlarged view of the shaded area (b). (C) OAI passivation treatment and enlarged view of the shaded area (d).

**Note:** After the PMAI spin coating passivation treatment, the PMAI on the film surface were almost completely converted to the 2D phase under heating. In contrast, no low-dimensional phase production were observed during the OAI treatment despite the annealing procedure.

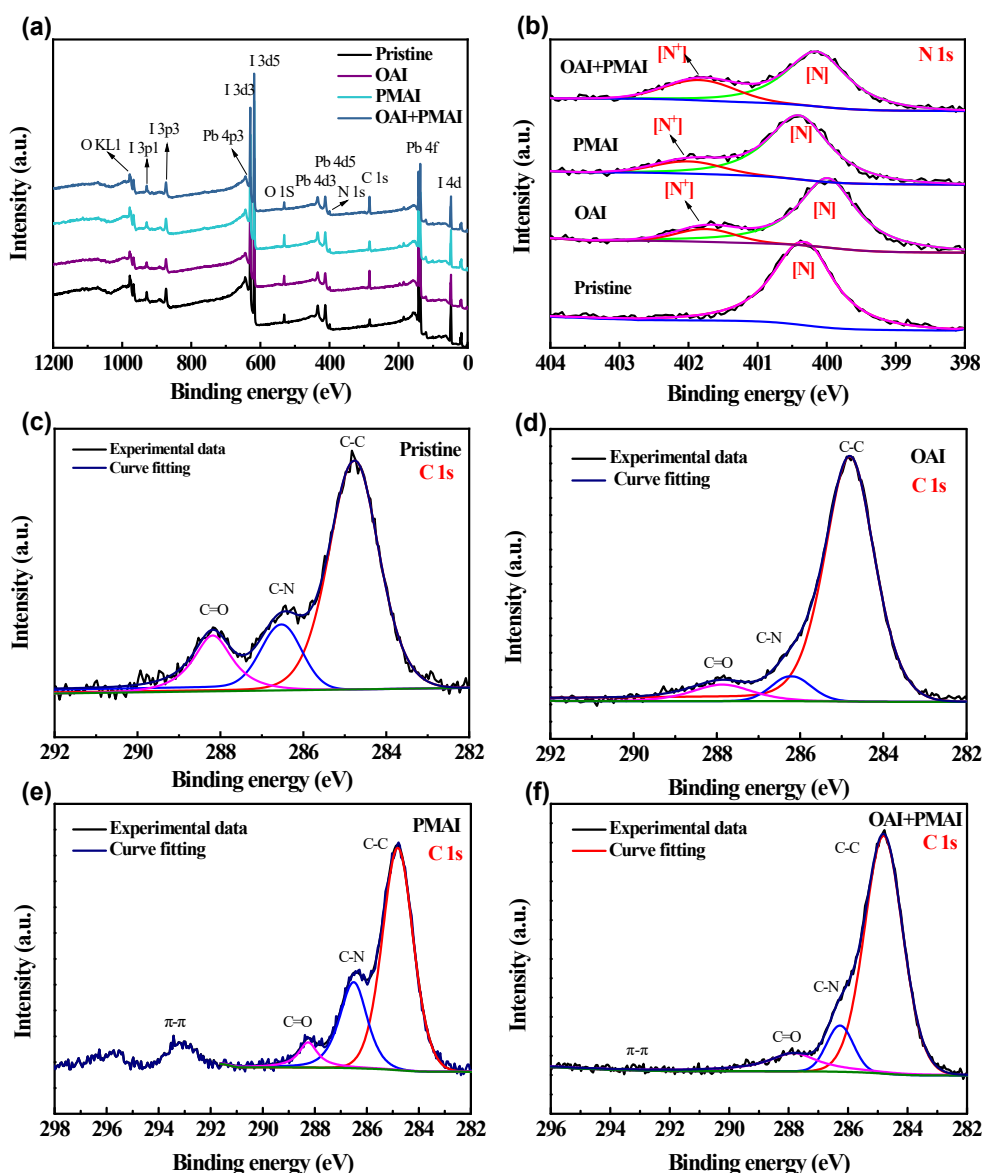

**Figure S5.** (a) Full XPS spectra of the perovskite films treatment in the range of 0 to 1200 eV binding energy. (b) XPS spectra of N1s. C 1s core level XPS spectra of different surface passivation schemes, (c) pristine, (d) OAI-treatment, (e) PMAI-treatment and (f) OAI+PMAI-treatment.

Compared to the pristine, additional peaks appeared in the N 1s core-electron spectra after various surface treatments, which confirmed the presence of surface ammonium salts (**Figure S5B**). The C 1s core-electron spectra are shown in **Figures S5C-S5F**, where the C-C and C-N bonds correspond to the presence of FA/MA cations. The peak with binding energy at around 293 eV corresponds to the  $\pi$ - $\pi$  bond in phenyl group of the PMA<sup>+</sup> cation. Notably, we found that the C=O peak associated with oxygen/water (288.0 eV) was significantly suppressed after various surface treatments, especially minimized when OAI+PMAI co-treatment was used. (**Table S1**), which is beneficial for improving the long-term stability of the device<sup>9</sup>.



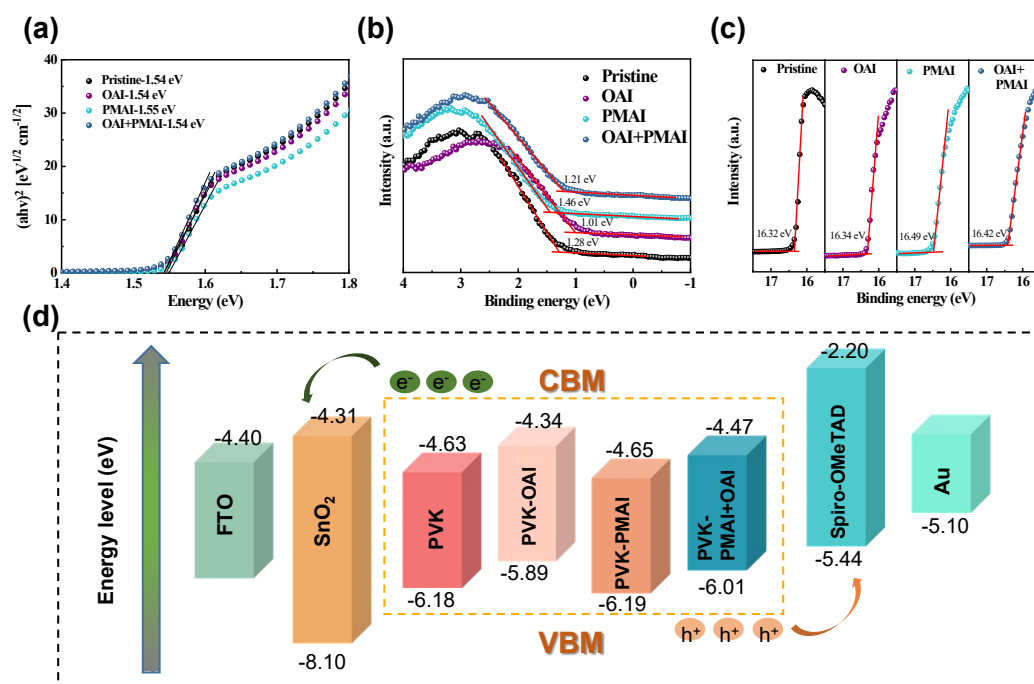

**Figure S6.** (a) Tauc plots for calculating optical band gaps from UV-vis absorption spectra. The UPS of perovskite film, the cut-off region (b) and the VBM (c) region. (d) Schematic energy level diagrams of perovskite solar cells.

**Note:** We investigated the change in energy levels of perovskite film surfaces before and after ammonium modulation using ultraviolet photoelectron spectroscopy (UPS) (Figures S6b and S6c). Compared with the pristine films, Fermi levels ( $E_f$ ) of the films all shifted upward after ligand modulation, indicating that the self-doping effect of the perovskite films was alleviated<sup>10</sup>. A significant upward shift of valence band maximum (VBM) and conduction band minimum (CBM) were observed after OAI coating, shortening the energy barrier with the adjacent HTL. In contrast, energy band of the PMAI-coated perovskite film does not shift obviously, with the film surface shifted to a relatively intrinsic nature. Importantly, we found the shift of the energy levels lies between the cases treated coatings individually after the OAI+PMAI bi-molecular treatment. This optimized forbidden band is more favorable for smoothing the band alignments of the HTL and perovskite layers (Figure S6d). The reason is that the value of the energy level difference between adjacent layers is too narrow to facilitate the thermodynamic transfer of carriers. If the value is too different again, it will lead to  $V_{OC}$  loss.

OAI mainly provides the ability to shift the bandgap level up, while PMAI provides the positive dipole layer to further reduce the recombination loss.

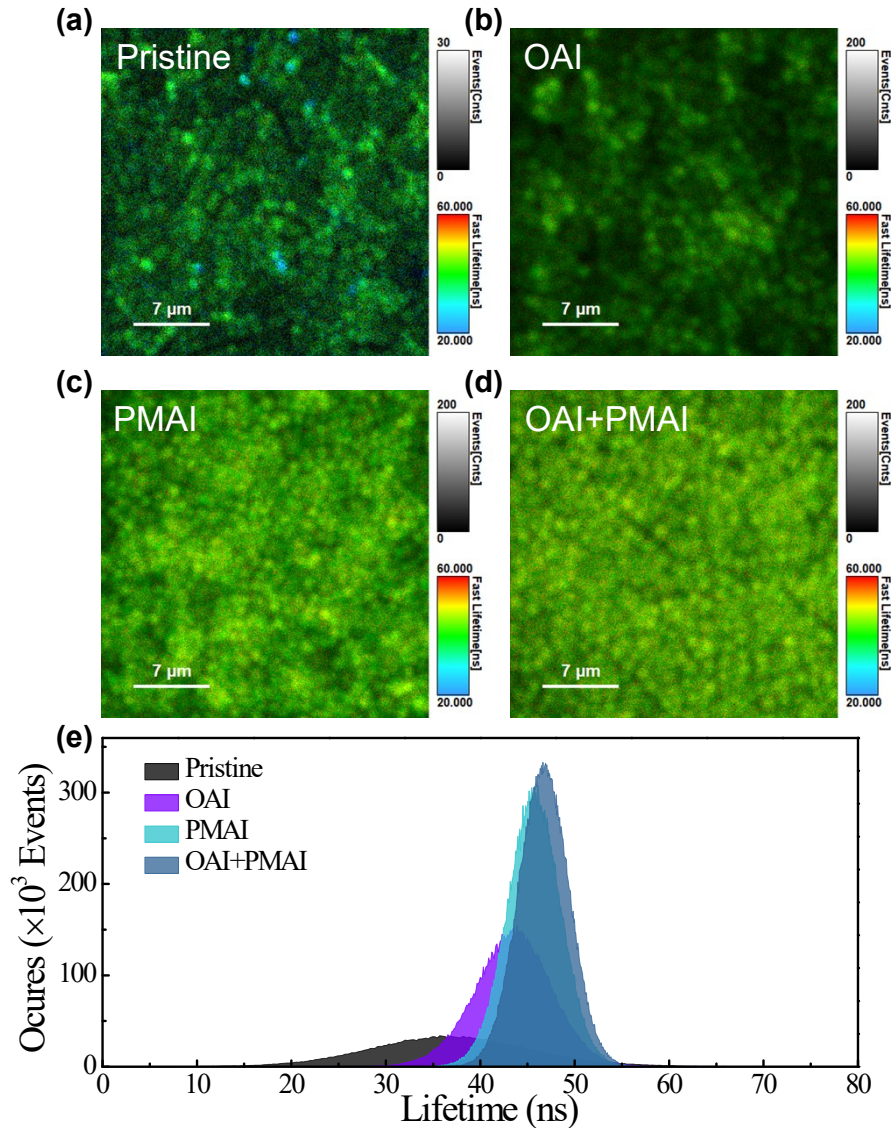

**Figure S7.** Time-resolved confocal fluorescence microscopy images of the control (a), OAI (b), PMAI (c) and OAI+PMAI (d) treated perovskite films. (e) PL occurs distribution of different carrier lifetime for the corresponding films.

We conducted an analysis of the spatially resolved distribution of charge carrier lifetime and photoluminescence (PL) intensity in perovskite thin films using TCFM. PL intensity maps and in-situ spatially resolved PL lifetime maps were displayed in the same image using grayscale and color scales, as shown in Figures S7 a-d. Due to spatial variations of trap-state distribution, all films exhibited pronounced spatial heterogeneity in PL intensity. In contrast, regions of short lifetime in the original film, depicted in light blue, transformed into areas of longer lifetime in light green and yellow-green after individual treatments with OAI and PMAI. Interestingly, after bi-molecular treatment with OAI+PMAI, the film exhibited even more yellow-green regions, indicating a significant prolongation of charge carrier lifetime. Both PL intensity and carrier lifetime across the grain region exceeded those at the grain boundaries, suggesting that defects are primarily located at the grain boundaries. It is noteworthy that the extraction of carrier lifetime distribution from TCFM images (Figure S7e) confirmed a substantial reduction of the light-blue regions in the OAI+PMAI bi-molecular treated film due to the increased average lifetime, consistent with the higher

crystallization quality and lower trap-state density of the film. These findings are in accordance with the above discussed PL and TPRL spectroscopic results.

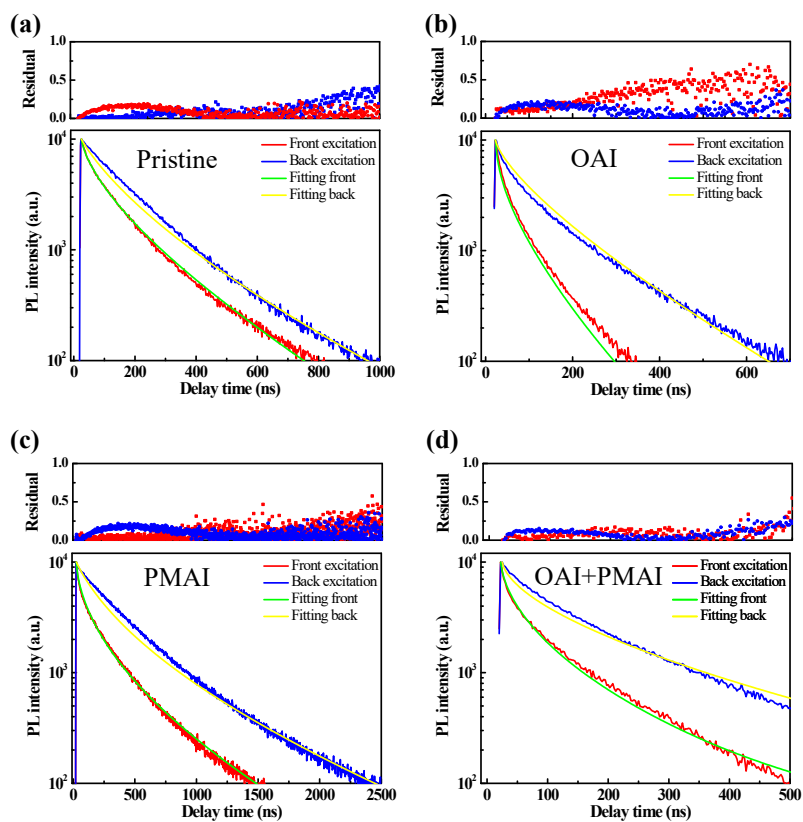

**Figure S8.** Fitting the TRPL measurements based on different surface passivation. The red and blue lines represent the experimental curves for frontal incidence and back incidence, respectively. The green and yellow lines correspond to the fitted curves, respectively.

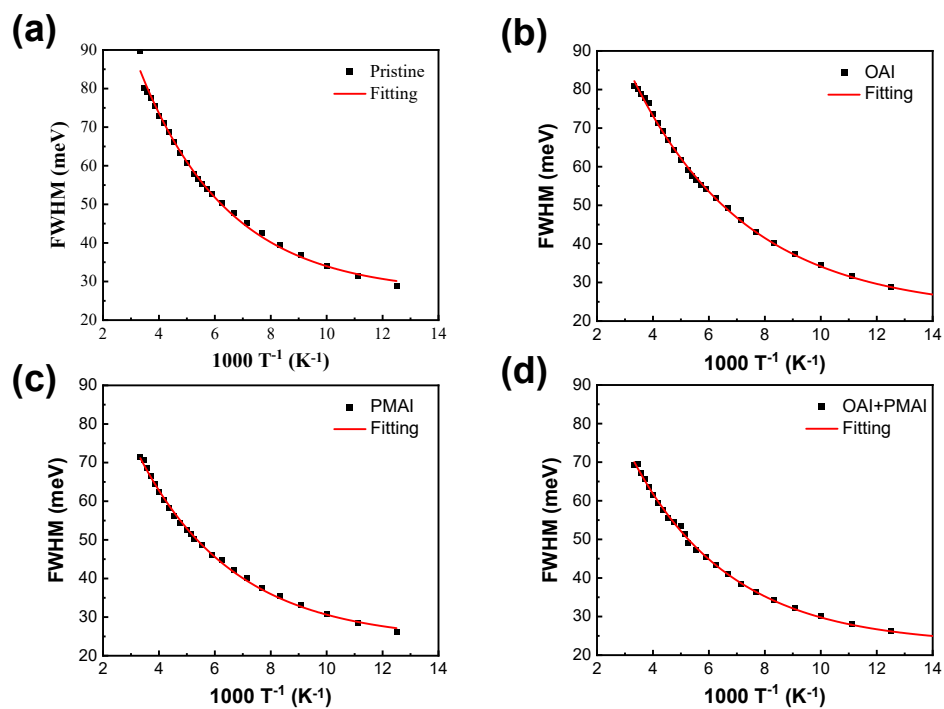

**Figure S9.** The temperature dependent PL measurements of the different surface treatment conditions. Temperature dependence of PL emission spectral width (FWHM) for different surface treated films in the range of 70 K to 300 K, (a) pristine, (b) OAI-treatment, c) PMAI-treatment and (d) OAI/PMAI-treatment.

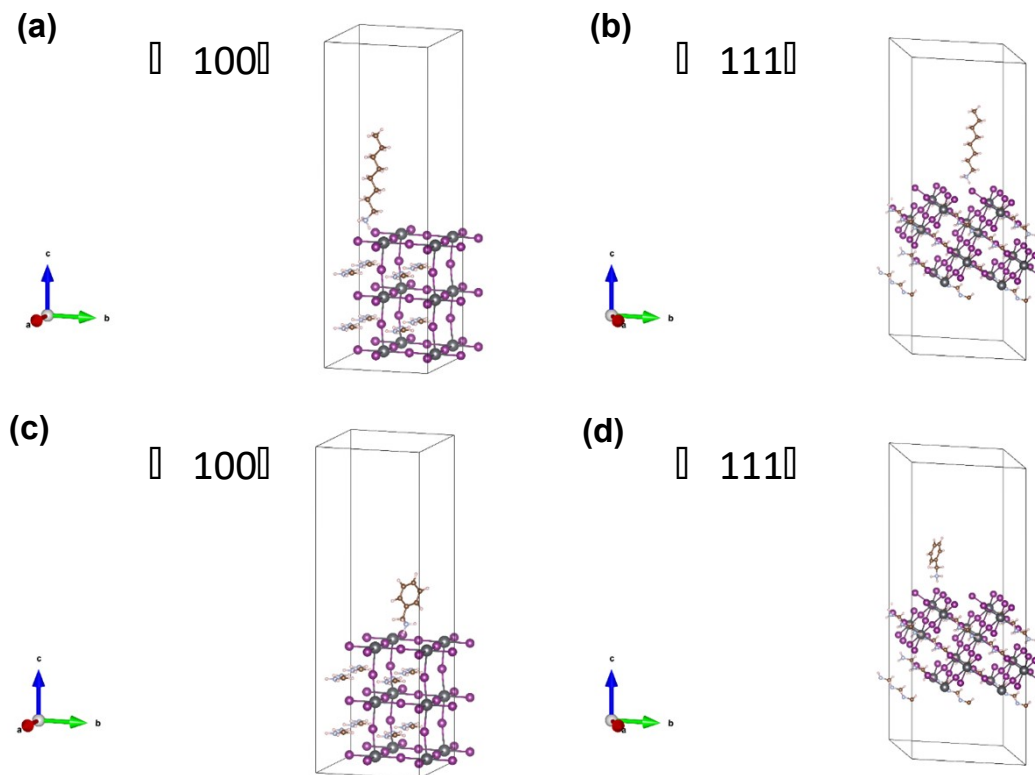

**Figure S10.** (a-d) Optimized structures for the adsorption of  $\text{OA}^+$  and  $\text{PMA}^+$  cation on the perovskite surface.

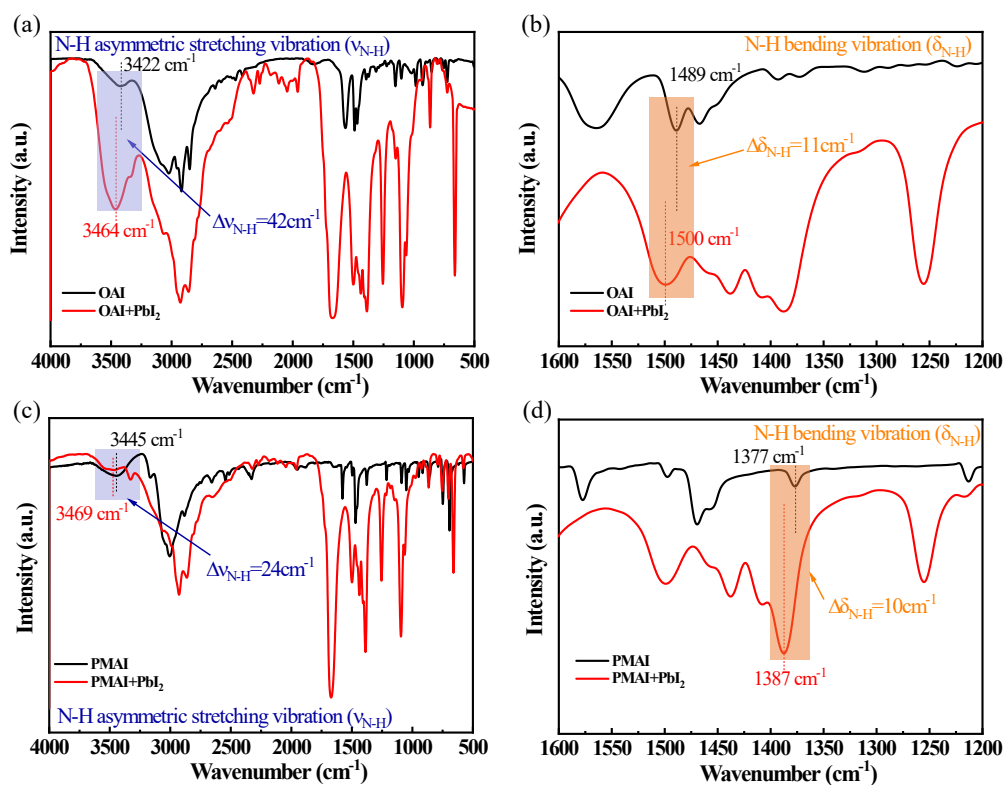

**Figure S11.** FTIR spectra of  $\text{PbI}_2$  with and without OAI (a, b), with and without PMAI (c, d).

**Note:** The surface passivation effect is believed to stem from the interaction between the ammonium cation and the Pb-I framework. Changes in the N-H asymmetric stretching vibration ( $\nu_{\text{N-H}}$ ) and N-H bending vibration ( $\delta_{\text{N-H}}$ ) in the FTIR spectra can be observed upon the mixture of OAI and PMAI with  $\text{PbI}_2$ , respectively. It is noteworthy that the  $\nu_{\text{N-H}}$  peak shifts from 3422 to 3464  $\text{cm}^{-1}$ , and  $\delta_{\text{N-H}}$  shifts from 1489 to 1500  $\text{cm}^{-1}$  after the addition of  $\text{PbI}_2$  to OAI. On the other hand, after the addition of  $\text{PbI}_2$  to PMAI, N-H peak shifts from 3445 to 3469  $\text{cm}^{-1}$ , and  $\delta_{\text{N-H}}$  shifts from 1377 to 1387  $\text{cm}^{-1}$ . This suggests that OAI is very likely to exhibit a greater absorptivity on the perovskite film”.

It is generally expected that the infrared vibrational peak of the N-H bond linking the H atom to the I atom through hydrogen bonding would move to a lower wave number position. However, this was not observed in our measurements. This is due to the dominant influence of the other three N-H bonds that are not involved in hydrogen bonding on the infrared properties of N-H in the hybrid system<sup>11</sup>.

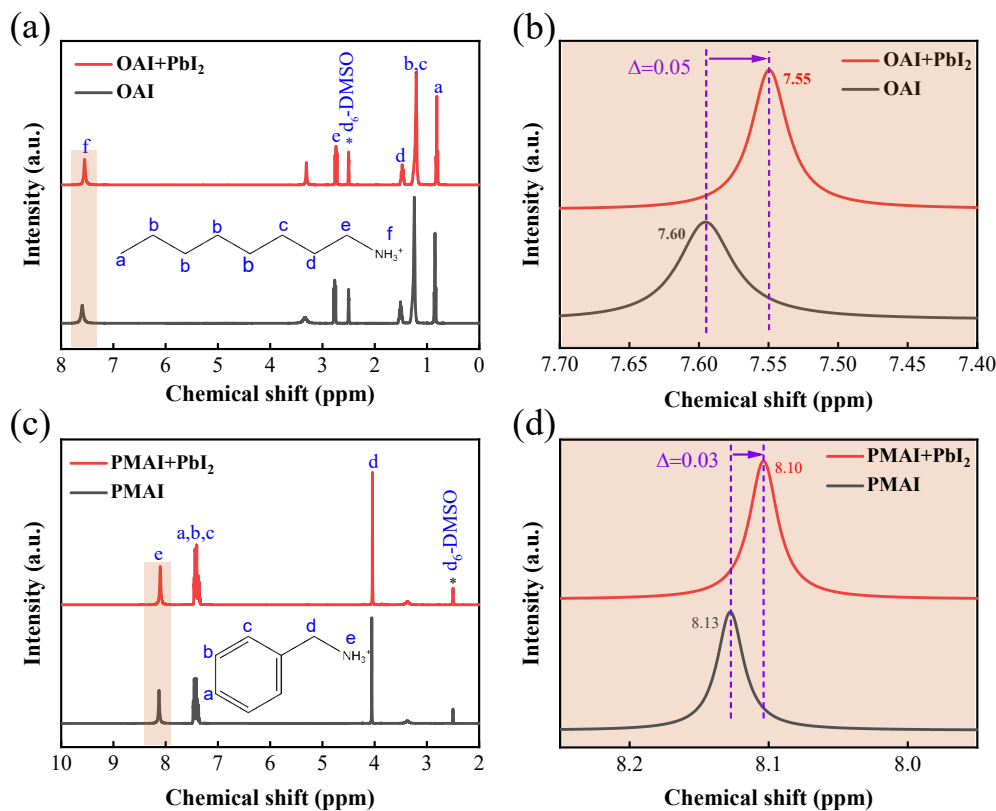

**Figure S12.**  $^1\text{H}$  NMR spectra of (a, b) OAI, OAI+PbI<sub>2</sub>, (c, d) PMAI and PMAI+ PbI<sub>2</sub>.

In these NMR spectra, the two peak signals at 7.60 ppm and 8.13 ppm correspond to the  $\text{NH}_3$  proton peaks of OAI and PMAI, respectively. Clearly, the significant shift of the proton peak for OAI, when the passivators are mixed with PbI<sub>2</sub> separately, implies a stronger  $\text{NH}_3 \cdots \text{I}$  hydrogen bonding interaction with the inorganic  $[\text{PbI}_6]^{4-}$  octahedral layer.

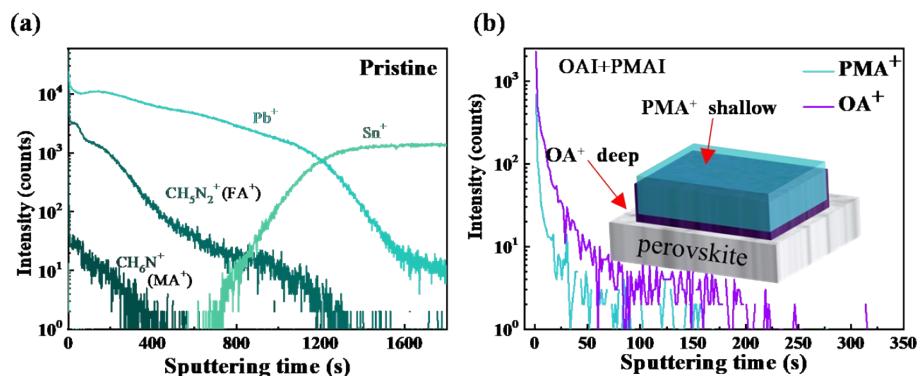

**Figure S13.** ToF-SIMS depth profiles of the pristine (a). (b) Enlarged view of OAI+PMAI treatment, inset illustrates the spatial distribution of both.

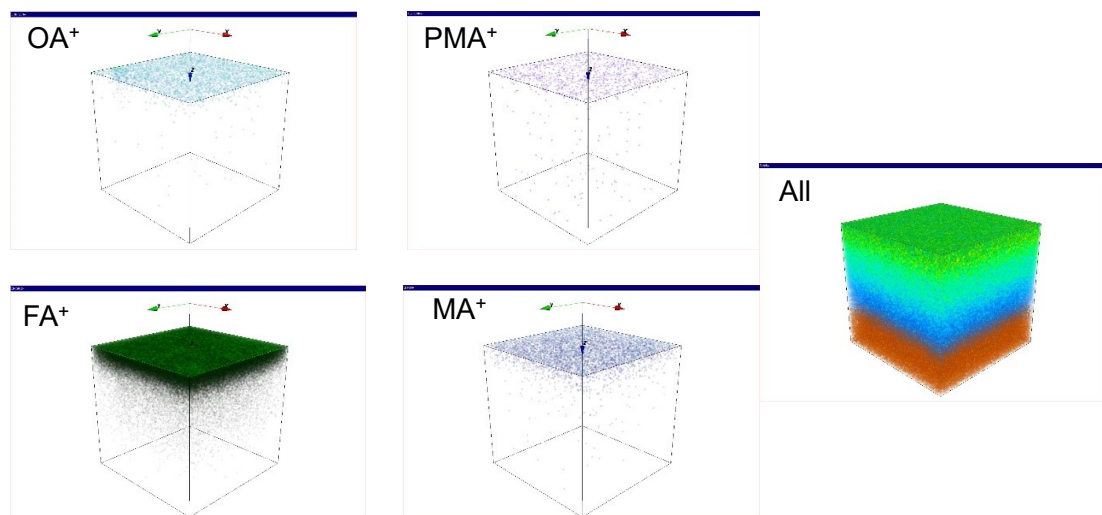

**Figure S14.** Three-dimensional reconstructed images of OAI/PMAI bi-molecular passivation-treated perovskite films. The tracked ions are all positively charged monovalent fragments and the tracked  $m/z$  values are 45 ( $\text{CH}(\text{NH}_2)_2^+$ ) for FA, 32 ( $\text{CH}_3\text{NH}_3^+$ ) for MA, 208 ( $\text{Pb}^+$ ) for Pb, 119 ( $\text{Sn}^{4+}$ ) for Sn, 130 ( $\text{C}_8\text{H}_{20}\text{N}^+$ ) for OA, 108 ( $\text{C}_7\text{H}_{10}\text{N}^+$ ) for PMA.

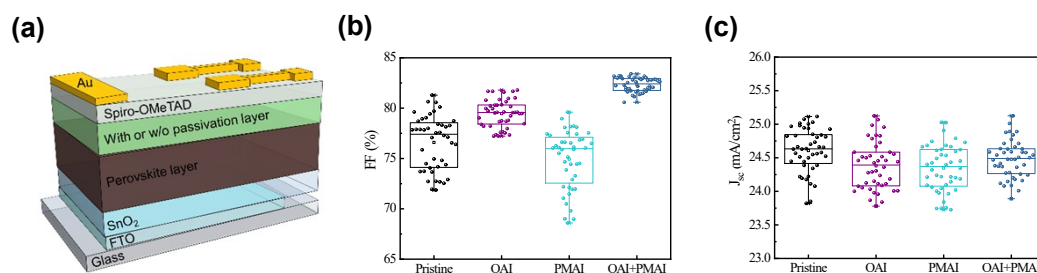

**Figure S15.** (a) The devices structure of perovskite solar cells. (b) and (c) Distribution of fill factor and short-circuit current density.

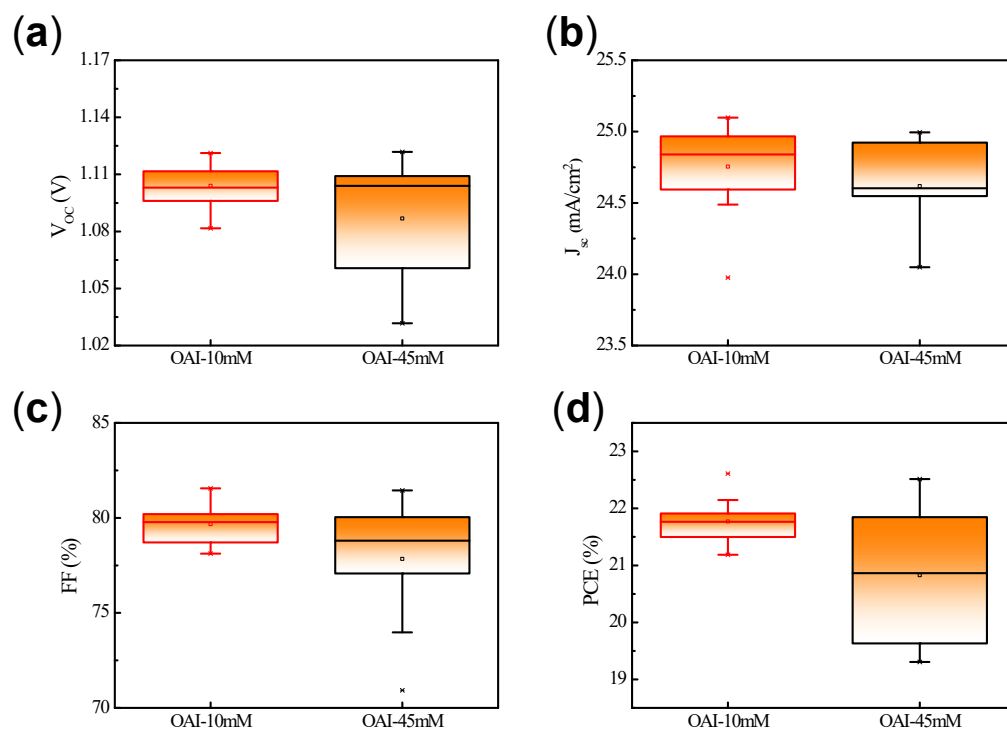

**Figure S16.** Statistical distribution of optoelectronic performance of surfaces treated with different OAI concentrations. (a) Open circuit voltage. (b) Short-circuit current. (c) Fill factor. (d) Power conversion.



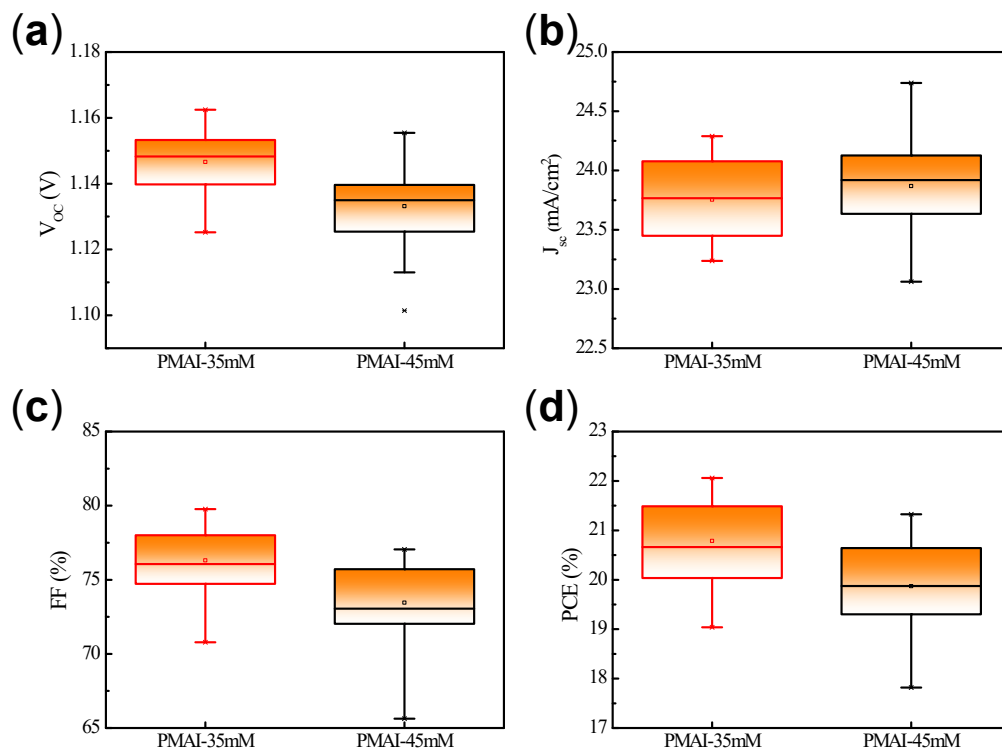

**Figure S17.** Statistical distribution of optoelectronic performance of surfaces treated with different PMAI concentrations. (a) Open circuit voltage. (b) Short-circuit current. (c) Fill factor. (d) Power conversion.

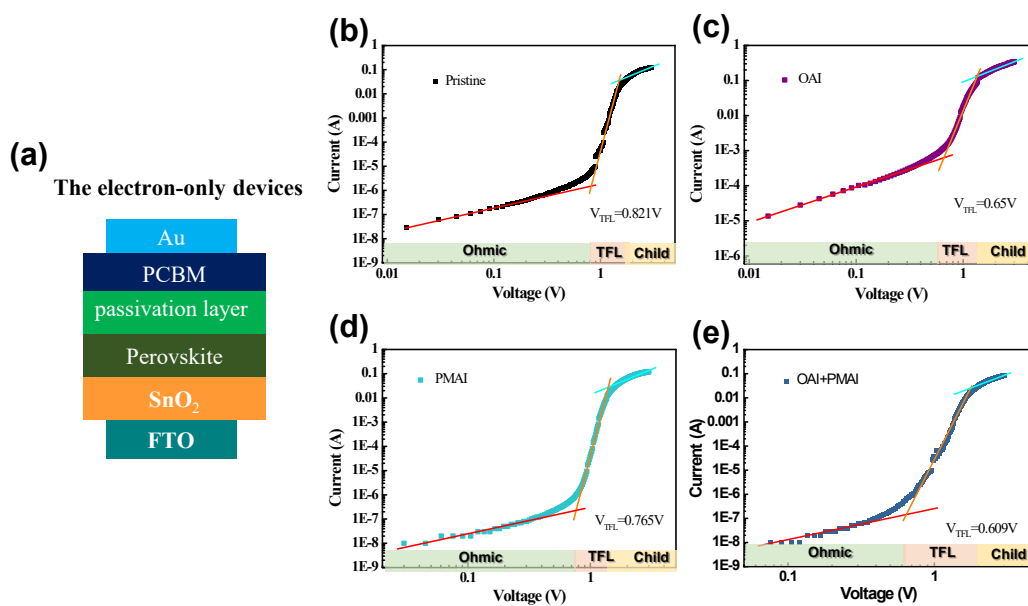

**Figure S18.** Space charge limited current (SCLC) measurements of defect density under different treatment conditions. (a) Schematic diagram of electron-only device

structure. C–V curves for electron-only devices with (b) pristine, (c) OAI-treatment, (d) PMAI-treatment and (e) OAI/PMAI-treatment.

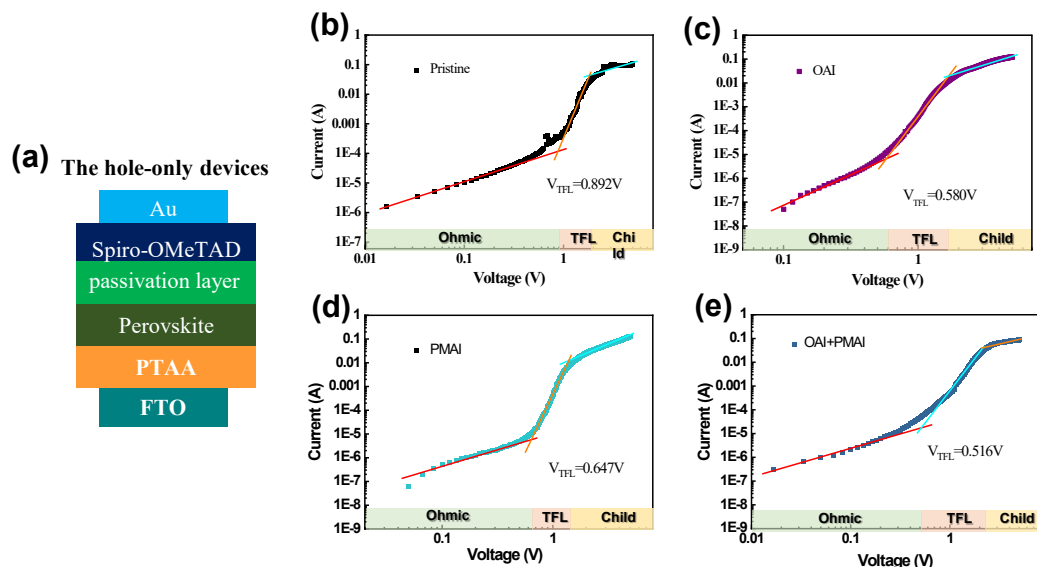

**Figure S19.** Space charge limited current (SCLC) measurements of defect density under different treatment conditions. (a) Schematic diagram of hole-only device structure. C–V curves for hole-only devices with (b) pristine, (c) OAI-treatment, (d) PMAI-treatment and (e) OAI/PMAI-treatment.

**Note :** The trap densities of different films were calculated by the space charge-limited current (SCLC) method. The dark currents of these devices are measured under an applied bias voltage, and the trap filling limit (TFL) region starts to increase abruptly when the bias voltage exceeds the twist junction. The trap fill limit voltage ( $V_{TFL}$ ) is the applied voltage at the kink point, i.e. the starting voltage in the TFL region. The trap density of states is calculated using the following equation:

$$N_t = \frac{2\varepsilon_0\varepsilon_r V_{TFL}}{eL^2}$$

where  $\varepsilon_0$  is the relative permittivity,  $N_t$  represents the trap density,  $\varepsilon_r$  is the vacuum tolerance,  $e$  is the fundamental charge, and  $L$  is the thickness of the perovskite film. The thickness of the film we set to 800 nm, which is the classical thickness of the perovskite film prepared by the two-step method.

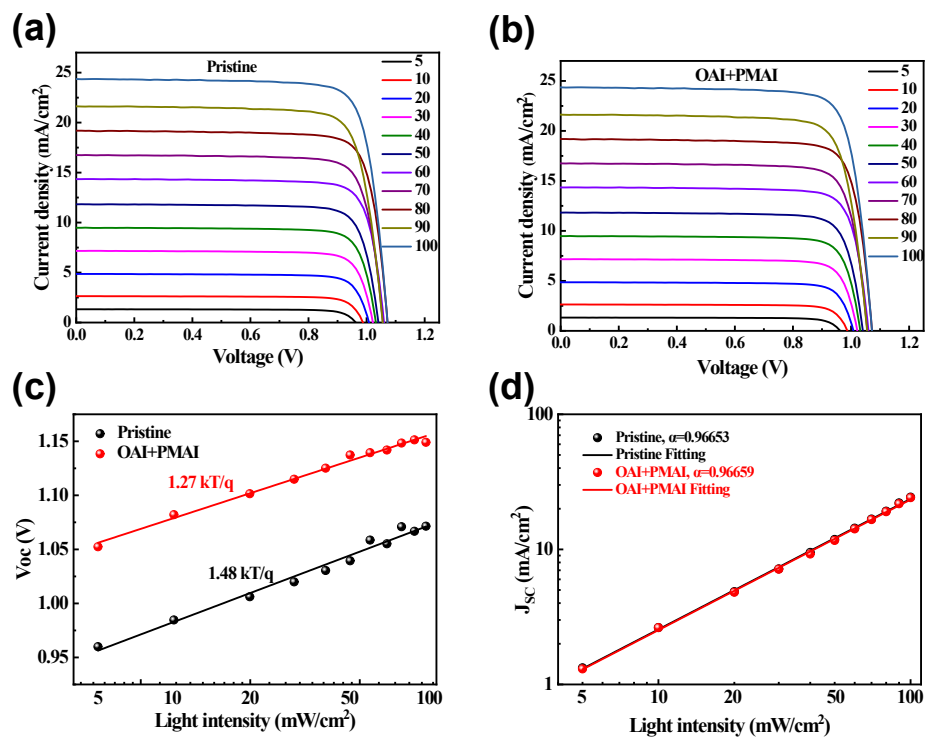

**Figure S20.** The response of devices under different light intensities for the pristine and OAI+PMAI (target) treated devices. (a) J-V curve of the pristine device and (b) OAI+PMAI bi-molecular treatment under different light intensity. Linear relationship of (c) V<sub>oc</sub> and (d) J<sub>sc</sub> with the natural logarithmic light intensity.

测试结果  
 Results of Test

测试报告  
 Test Report

报告编号: 测试字第 202208000768 号  
 Report No.  
 防伪码  
 7197651804085834  
 911880234809511cf  
 cbc-f400533a7e7e7  
 7c6ed59445b1abc1

客户名称: University of Electronic Science and Technology of China  
 Client Name  
 联络信息: /  
 Contact Information  
 样品名称: Perovskite Solar Cell  
 Sample Name  
 型号/规格: 0.0491 cm<sup>2</sup>  
 Model  
 样品编号: PVK MYY 02  
 Sample No.  
 标称生产单位: School of Materials and Energy, University of Electronic Science and Technology of China  
 Manufacturer

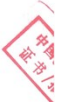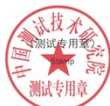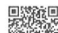

扫码验真  
 1903340428

批准人: 苏志林  
 Approved by

签发日期: 2022 年 08 月 19 日  
 Issue Date Year Month Day

地址: 中国·四川·成都玉双路 10 号  
 Address: No.10, Yushuang Road, Chengdu, Sichuan, China  
 邮编: 610021  
 Post Code  
 网址: www.nimtt.cn  
 Web

电话: 028-84404337  
 Telephone  
 传真: 028-84404149  
 Fax  
 邮箱: kfzx@nimtt.com  
 E-mail

第 1 页 共 5 页  
 Page of

1. Test Condition  
 (1) Reference Cell: Mono-Si Solar Cell (Certification by Newport)  
 (2) Sample Information: Inverted Structured Solar Cell with an Aperture Area of 0.0491 cm<sup>2</sup>  
 (3) Storage Condition of Sample Before Test: Temperature: 25°C; Humidity: 0.01%; stored in Dark for 24 Hours.

2. Methodologies and Settings  
 (1) I-V Test for Sample was conducted Using 3A Classification of Solar Simulator (Spectrum: AM1.5G) calibrated to 1000 W/m<sup>2</sup> by the Reference Cell.  
 (2) Parameter Settings for I-V Test are Shown in Table 1:

| Scan Mode    | Start Voltage | End Voltage | Step    | Delay | Light Soaking Pre-treatment |
|--------------|---------------|-------------|---------|-------|-----------------------------|
| Forward scan | -0.1 V        | 1.20 V      | 0.013 V | 10 ms | No                          |
| Reverse scan | 1.20 V        | -0.1 V      | 0.013 V | 10 ms | No                          |

3. Test Results  
 Current-Voltage Curves are Shown in Figure 1 and 2.

证书续页 (v202101)  
 Continued Page

第 4 页 共 5 页  
 Page of

测试结果  
 Results of Test

Irradiated I-V parameters for Perovskite Solar Cell are Shown in Table 2:

| Scan Mode    | Short-circuit Current | Open-circuit Voltage | Fill Factor | Maximum-Power | Maximum-Power Voltage | Maximum-Power Current | Conversion Efficiency |
|--------------|-----------------------|----------------------|-------------|---------------|-----------------------|-----------------------|-----------------------|
|              | $I_{sc}$ (mA)         | $V_{oc}$ (mV)        | FF (%)      | $P_m$ (mW)    | $V_{pm}$ (V)          | $I_{pm}$ (mA)         | $\eta$ (%)            |
| Forward scan | 1.27                  | 1.16                 | 74.7        | 1.10          | 0.96                  | 1.15                  | 22.4                  |
| Reverse scan | 1.27                  | 1.17                 | 82.6        | 1.23          | 1.03                  | 1.19                  | 25.0                  |

Remarks:  
 Reported Performance Parameters Take the Average of Three Test Values.

说明: /  
 Note

核验员: 吴伟钢  
 Checked by  
 测试员: 康永李  
 Tested by

证书续页 (v202101)  
 Continued Page

第 5 页 共 5 页  
 Page of

**Figure S21.** Test report from National Institute of Measurement and Testing Technology, Power conversion efficiency of 25.0% for single-junction perovskite solar cells implementing OAI/PMAI bi-molecular passivation strategy on the surface of perovskite films.

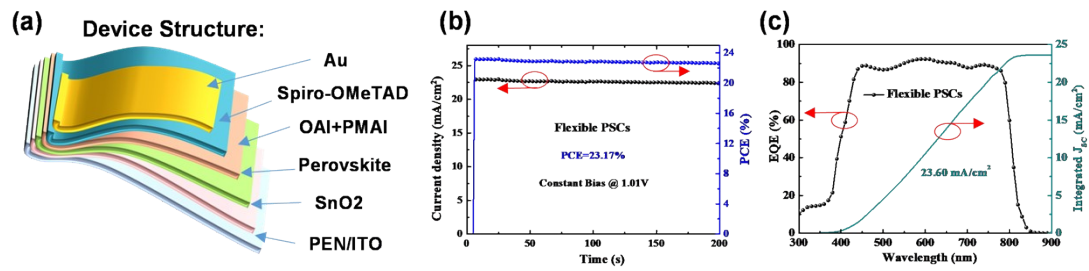

**Figure S22.** (a) The structure diagram of flexible PSCs. (b) The stable output of champion flexible device at  $V_{\text{bis}}=1.01$  V. (c) EQE spectrum and the corresponding integrated current density of the champion flexible device after the addition of the reflective reduction layer.

**Table S1.** Fitting results of C1s core energy levels for different surface treatment cases

| Samples  | C=O  | C-N  | C-C | Area ratio |
|----------|------|------|-----|------------|
| Pristine | 0.24 | 0.27 | 1   | 0.24       |
| OAI      | 0.07 | 0.1  | 1   | 0.07       |
| PMAI     | 0.1  | 0.37 | 1   | 0.1        |
| OAI+PMAI | 0.08 | 0.19 | 1   | 0.08       |

**Table S2.** Summary the TRPL of the perovskite films fitted by bi-exponential decay function:  $y = A_1 \exp(-t/\tau_1) + A_2 \exp(-t/\tau_2) + B$ . The average lifetime ( $\tau_{ave}$ ) is obtained via the relation  $\tau_{ave} = (A_1\tau_1^2 + A_2\tau_2^2) / (A_1\tau_1 + A_2\tau_2)$ . Where  $A_1$  and  $A_2$  are the decay amplitudes, and  $\tau_1$  and  $\tau_2$  are the decay time constants.

| Samples  | $A_1$  | $\tau_1$ ( $\mu$ s) | $A_2$  | $\tau_2$ ( $\mu$ s) | $\tau_{av}$ ( $\mu$ s) |
|----------|--------|---------------------|--------|---------------------|------------------------|
| pristine | 5360.7 | 0.381               | 3236.0 | 0.055               | 0.355                  |
| OAI      | 1781.7 | 0.691               | 3269.0 | 0.168               | 0.529                  |
| PMAI     | 3629.0 | 0.786               | 4054.7 | 0.249               | 0.646                  |
| OAI+PMAI | 4260.3 | 1.056               | 2397.0 | 0.060               | 1.026                  |

**Table S3.** List of best fitting results of charge carrier dynamics parameters.

|               | Pristine              | OAI                   | PMAI                   | OAI+PMAI               |
|---------------|-----------------------|-----------------------|------------------------|------------------------|
| $D[m^2/s]$    | $4.55 \times 10^{-9}$ | $1.76 \times 10^{-8}$ | $4.5 \times 10^{-9}$   | $6.99 \times 10^{-9}$  |
| $k_1[s^{-1}]$ | $1.565 \times 10^6$   | $4.425 \times 10^6$   | $5 \times 10^5$        | $2 \times 10^6$        |
| $k_2[cm^3/s]$ | $8 \times 10^{-10}$   | $7.6 \times 10^{-11}$ | $6.77 \times 10^{-10}$ | $1.07 \times 10^{-10}$ |
| $S_0[m/s]$    | 5.06                  | 2.65                  | 8.19                   | 0.8                    |
| $S_L[m/s]$    | 0.08                  | 0.09                  | 0.06                   | 0.05                   |

**Table S4.** The Boson model fitting parameters from the FWHM vs. temperature plots.

| Samples  | $\Gamma_0$ (m eV) | $\Gamma_{op}$ (m eV) | $E_{op}$ (m eV) | $R^2$ |
|----------|-------------------|----------------------|-----------------|-------|
| Pristine | 26.92±1.34        | 60.58±2.93           | 0.027±0.00152   | 0.998 |
| OAI      | 22.52±0.61        | 49.72±0.71           | 0.021±0.00049   | 0.998 |
| PMAI     | 23.89±0.65        | 46.07±1.05           | 0.025±0.00083   | 0.998 |
| OAI+PMAI | 22.70±0.49        | 45.03±0.93           | 0.024±0.00064   | 0.998 |

**Table S5.** Summary of fitting impedance spectroscopy.

| Samples  | $R_s$ ( $\Omega$ ) | $R_c$ ( $\Omega$ ) | CPE                   |
|----------|--------------------|--------------------|-----------------------|
| Pristine | 12.7               | 240.6              | $2.09 \times 10^{-8}$ |
| OAI      | 13.3               | 183                | $1.48 \times 10^{-8}$ |
| PMAI     | 4.95               | 277                | $7.2 \times 10^{-8}$  |
| OAI+PMAI | 15.6               | 80.8               | $5.79 \times 10^{-8}$ |

**Table S6.** Space-limited charge current (SCLC) calculation results of the electron-only devices based on the Pristine, OAI, PMAI and OAI+PMAI PSCs, respectively. The thickness of perovskite film is estimated at 800 nm.

| Samples  | $V_{TFL}$ (V) | $N_{trap}$ ( $cm^{-3}$ ) |
|----------|---------------|--------------------------|
| Pristine | 0.821         | $8.83 \times 10^{15}$    |
| OAI      | 0.659         | $7.09 \times 10^{15}$    |
| PMAI     | 0.765         | $8.23 \times 10^{15}$    |
| OAI+PMAI | 0.609         | $6.55 \times 10^{15}$    |

**Table S7.** Space-limited charge current (SCLC) calculation results of the hole-only devices based on the Pristine, OAI, PMAI and OAI+PMAI PSCs, respectively. The thickness of perovskite film is estimated at 800 nm.

| Samples  | $V_{TFL}$ (V) | $N_{trap}$ (cm <sup>-3</sup> ) |
|----------|---------------|--------------------------------|
| Pristine | 0.892         | 9.59*10 <sup>15</sup>          |
| OAI      | 0.580         | 6.24*10 <sup>15</sup>          |
| PMAI     | 0.647         | 6.96*10 <sup>15</sup>          |
| OAI+PMAI | 0.516         | 5.55*10 <sup>15</sup>          |

**Table S8.** The photovoltaic performance parameters of 50 randomly optimized device samples treated with OAI+PMAI bi-molecular passivation.

| Sample | $V_{OC}$ (V) | $J_{SC}$ (mA/cm <sup>2</sup> ) | Fill Factor (%) | Efficiency (%) |
|--------|--------------|--------------------------------|-----------------|----------------|
| 1#     | 1.159        | 25.092                         | 82.934          | 24.118         |
| 2#     | 1.163        | 25.427                         | 83.167          | 24.589         |
| 3#     | 1.161        | 25.206                         | 83.513          | 24.450         |
| 4#     | 1.161        | 24.806                         | 84.017          | 24.195         |
| 5#     | 1.160        | 25.056                         | 83.840          | 24.371         |
| 6#     | 1.163        | 25.637                         | 84.391          | 25.153         |
| 7#     | 1.163        | 25.120                         | 84.232          | 24.602         |
| 8#     | 1.161        | 25.756                         | 84.349          | 25.230         |
| 9#     | 1.160        | 25.504                         | 82.788          | 24.502         |
| 10#    | 1.162        | 24.988                         | 84.204          | 24.459         |
| 11#    | 1.163        | 25.459                         | 84.045          | 24.878         |
| 12#    | 1.162        | 25.098                         | 84.697          | 24.698         |
| 13#    | 1.158        | 25.272                         | 83.006          | 24.289         |
| 14#    | 1.163        | 25.136                         | 84.446          | 24.691         |
| 15#    | 1.161        | 24.923                         | 83.822          | 24.259         |
| 16#    | 1.162        | 24.918                         | 84.863          | 24.566         |
| 17#    | 1.160        | 24.914                         | 83.168          | 24.030         |
| 18#    | 1.162        | 25.450                         | 85.034          | 25.142         |
| 19#    | 1.163        | 25.168                         | 84.116          | 24.626         |
| 20#    | 1.164        | 25.269                         | 82.916          | 24.387         |
| 21#    | 1.163        | 25.624                         | 83.605          | 24.910         |
| 22#    | 1.169        | 25.160                         | 84.261          | 24.783         |
| 23#    | 1.165        | 25.160                         | 84.516          | 24.765         |
| 24#    | 1.160        | 25.625                         | 83.356          | 24.782         |
| 25#    | 1.164        | 25.217                         | 84.628          | 24.845         |
| 26#    | 1.168        | 25.543                         | 81.545          | 24.331         |
| 27#    | 1.167        | 26.015                         | 80.140          | 24.327         |



|                |              |               |               |               |
|----------------|--------------|---------------|---------------|---------------|
| 28#            | 1.169        | 25.327        | 81.954        | 24.265        |
| 29#            | 1.158        | 25.529        | 81.263        | 24.020        |
| 30#            | 1.169        | 25.885        | 82.613        | 24.991        |
| 31#            | 1.173        | 25.212        | 83.458        | 24.674        |
| 32#            | 1.174        | 25.436        | 82.902        | 24.748        |
| 33#            | 1.166        | 25.508        | 81.117        | 24.129        |
| 34#            | 1.170        | 25.121        | 82.440        | 24.230        |
| 35#            | 1.170        | 25.282        | 81.764        | 24.193        |
| 36#            | 1.171        | 25.434        | 82.489        | 24.573        |
| 37#            | 1.173        | 25.386        | 82.161        | 24.469        |
| 38#            | 1.176        | 24.951        | 83.068        | 24.367        |
| 39#            | 1.172        | 25.817        | 81.406        | 24.630        |
| 40#            | 1.175        | 25.254        | 82.341        | 24.425        |
| 41#            | 1.168        | 24.989        | 82.377        | 24.045        |
| 42#            | 1.168        | 25.491        | 81.926        | 24.394        |
| 43#            | 1.169        | 25.879        | 81.619        | 24.692        |
| 44#            | 1.169        | 25.946        | 81.664        | 24.777        |
| 45#            | 1.173        | 25.671        | 82.916        | 24.967        |
| 46#            | 1.168        | 25.959        | 79.950        | 24.251        |
| 47#            | 1.171        | 25.618        | 82.134        | 24.637        |
| 48#            | 1.174        | 25.790        | 82.316        | 24.930        |
| 49#            | 1.174        | 25.938        | 82.103        | 24.998        |
| 50#            | 1.173        | 25.491        | 81.783        | 24.452        |
| <b>Average</b> | <b>1.166</b> | <b>25.389</b> | <b>82.947</b> | <b>24.556</b> |

**Table S9.** PCEs versus time for unencapsulated devices stored in ambient condition

| Condition | Time (h) | PCE (%)  | Retention rate (%) | Deviation (%) |
|-----------|----------|----------|--------------------|---------------|
| Pristine  | 0        | 19.59817 | 100                | 0.36902       |
|           | 73       | 18.67255 | 95.27              | 0.52534       |
|           | 490      | 18.10685 | 92.39              | 0.84835       |
|           | 976      | 18.09482 | 92.32              | 1.36787       |
|           | 1440     | 19.06632 | 97.28              | 0.86259       |
| OAI       | 0        | 20.88634 | 100                | 0.55881       |
|           | 73       | 19.65161 | 94.08              | 0.50782       |
|           | 490      | 18.83957 | 90.20              | 1.19885       |
|           | 976      | 18.51158 | 88.63              | 0.79087       |
|           | 1440     | 18.98991 | 90.92              | 0.72763       |
| PMAI      | 0        | 21.45849 | 100                | 0.93711       |
|           | 73       | 20.30379 | 94.61              | 0.77768       |
|           | 490      | 13.71424 | 63.91              | 2.54626       |
|           | 976      | 14.6306  | 68.18              | 1.67939       |

|          |      |          |        |         |
|----------|------|----------|--------|---------|
|          | 1440 | 13.99036 | 65.19  | 1.63558 |
|          | 0    | 21.95681 | 100    | 0.95956 |
|          | 73   | 22.06948 | 105.51 | 0.7623  |
| OAI+PMAI | 490  | 21.59597 | 98.35  | 0.84762 |
|          | 976  | 20.67001 | 94.14  | 1.35544 |
|          | 1440 | 21.65987 | 98.64  | 0.35272 |

**Table S10.** Summary on representative progress of state-of-the-art perovskite solar cells by two-step fabrication under n-i-p configuration since 2019.

| Years       | $V_{OC}$<br>(V) | $J_{sc}$<br>(mA cm <sup>-2</sup> ) | FF<br>(%)    | PCE<br>(%)   | Type of cations                 | References                                      |
|-------------|-----------------|------------------------------------|--------------|--------------|---------------------------------|-------------------------------------------------|
| 2019        | 1.16            | 24.9                               | 81.4         | 23.56        | Mixed-cations<br>(FAMA)         | Nature Photonics,<br>2019, 13(7): 460-<br>466.  |
| 2020        | 1.16            | 24.8                               | 81.3         | 23.5         | Mixed-cations<br>(FAMAGA)       | Advanced<br>Materials.<br>2020, 32, 11.         |
| 2021        | 1.18            | 24.95                              | 81.58        | 24.01        | Mixed-cations<br>(FAMA)         | Energy Environ.<br>Sci., 2021,14, 5074-<br>5083 |
| 2021        | 1.17            | 25.34                              | 81.36        | 24.1         | Single -cations<br>(FA)         | Science,2021, 371,<br>1359                      |
| 2021        | 1.16            | 25.01                              | 83.44        | 24.27        | Mixed-cations<br>(FAMACs)       | Science, 2021,<br>373(6554): 561-567            |
| 2022        | 1.18            | 25.0                               | 82.7         | 24.4         | Mixed-cations<br>(FAMA)         | Advanced<br>Materials, 2022,<br>34(8): 2106118. |
| 2022        | 1.17            | 25.30                              | 84.2         | 24.95        | Mixed-cations<br>(FAMA)         | Joule, 2022, 6(12):<br>2869-2884.               |
| 2022        | 1.18            | 26.3                               | 82.7         | 25.6         | Single -cations<br>(FA)         | Science,2022,377,<br>531–534                    |
| 2023        | 1.171           | 25.28                              | 84.57        | 25.03        | Mixed-cations<br>(FAMA)         | Advanced<br>Materials, 2023:<br>2210186.        |
| 2023        | 1.18            | 25.77                              | 83.50        | 25.39        | Single-cations<br>(FA)          | Nature<br>Communications,<br>2023, 14(1): 6125. |
| 2023        | 1.17            | 25.72                              | 83.67        | 25.17        | Mixed-cations<br>(FAMA)         | Nature Photonics,<br>2023: 1-9                  |
| 2023        | 1.19            | 26.39                              | 82.94        | 26.07        | Single-cations<br>(FA)          | Nature, (2023)<br>1476-4687 (online)            |
| <b>2023</b> | <b>1.16</b>     | <b>25.76</b>                       | <b>84.35</b> | <b>25.23</b> | <b>Mixed-cations<br/>(FAMA)</b> | <b>This work</b>                                |

## References

1. K.-i. Ataka, T. Yotsuyanagi and M. Osawa, *J Phys Chem C*, 1996, **100**, 10664-10672.
2. H. A. Posch, W. G. Hoover and F. J. Vesely, *Physical Review A*, 1986, **33**, 4253-4265.
3. W. G. Hoover and B. L. Holian, *Physics Letters A*, 1996, **211**, 253-257.
4. W. Kohn and L. J. Sham, *Physical Review*, 1965, **140**, A1133-A1138.
5. T. Yanai, D. P. Tew and N. C. Handy, *Chemical Physics Letters*, 2004, **393**, 51-57.
6. J. F. Li, Y. F. Huang, Y. Ding, Z. L. Yang, S. B. Li, X. S. Zhou, F. R. Fan, W. Zhang, Z. Y. Zhou, D. Y. Wu, B. Ren, Z. L. Wang and Z. Q. Tian, *Nature*, 2010, **464**, 392-395.
7. Z. D. Schultz, S. K. Shaw and A. A. Gewirth, *Journal of the American Chemical Society*, 2005, **127**, 15916-15922.
8. W.-T. Liu and Y. R. Shen, *Proc. Natl. Acad. Sci. U. S. A.*, 2014, **111**, 1293-1297.
9. Q. Jiang, Y. Zhao, X. Zhang, X. Yang, Y. Chen, Z. Chu, Q. Ye, X. Li, Z. Yin and J. You, *Nat. Photonics*, 2019, **13**, 460-466.
10. D. Meggiolaro, D. Ricciarelli, A. A. Alasmari, F. A. S. Alasmary and F. De Angelis, *J. Phys. Chem. Lett.*, 2020, **11**, 3546-3556.
11. S. Tan, J. Shi, B. Yu, W. Zhao, Y. Li, Y. Li, H. Wu, Y. Luo, D. Li and Q. Meng, *Adv. Funct. Mater.*, 2021, **31**, 2010813.
